# Supplementary material for: Necroptosis does not drive disease pathogenesis in a mouse infective model of SARS-CoV-2 in vivo
Source: PubMed Central journal article supplement (PMC10825138; doi:10.1038/s41419-024-06471-6), 2024-01-30

Original Data Files

Fig. 1D

p-MLKL

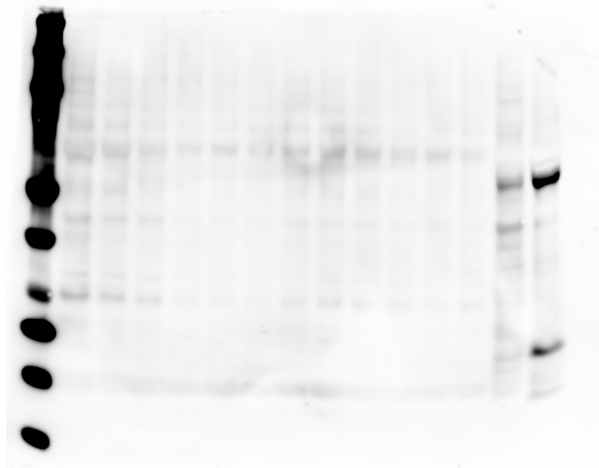

MLKL and GAPDH

↓ stripping

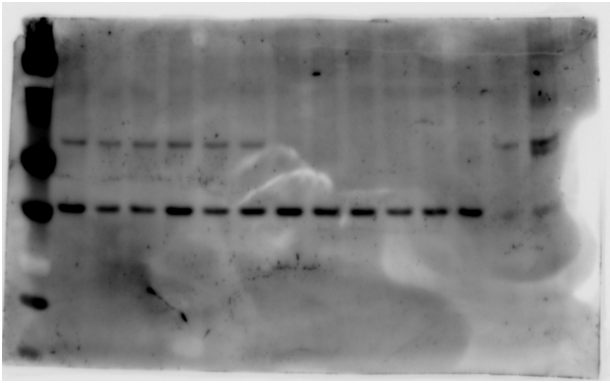

p-RIPK1

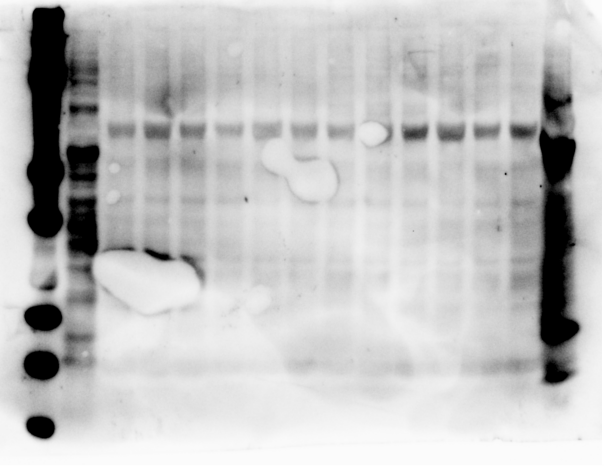

p-RIPK3

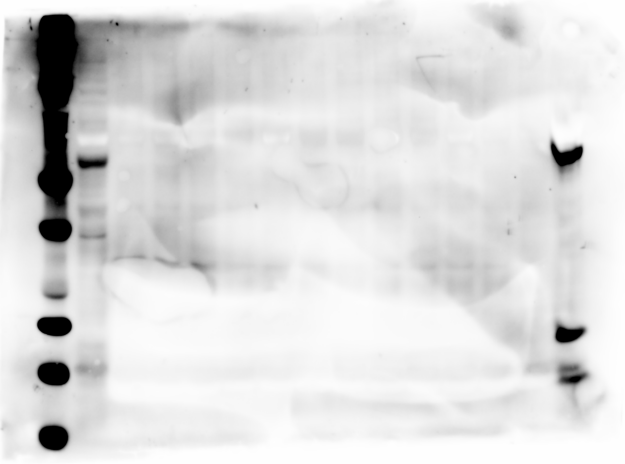

GAPDH (p-RIPK1 and p-RIPK3)

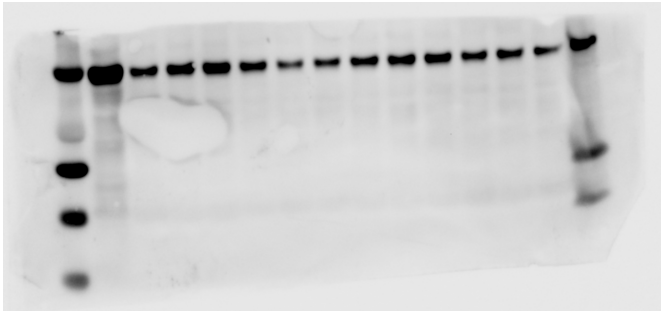

RIPK3

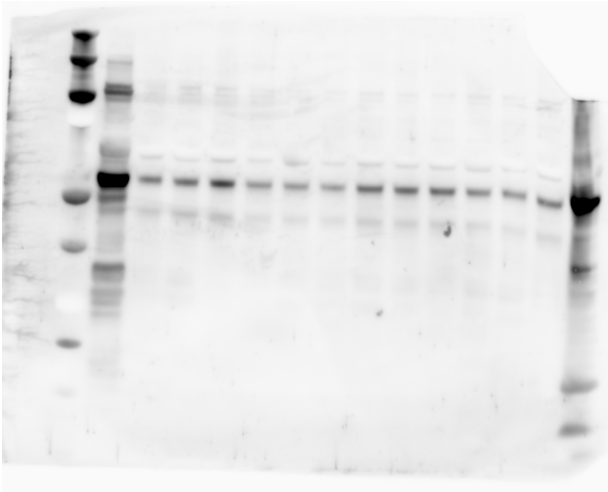

RIPK1

↓ stripping

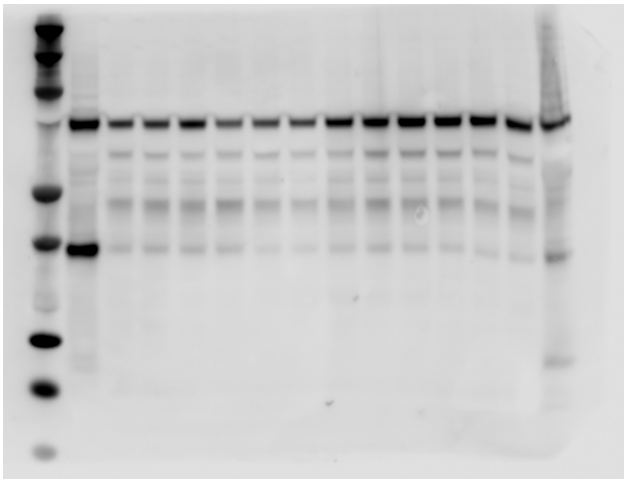

GAPDH (RIPK1 and RIPK3)

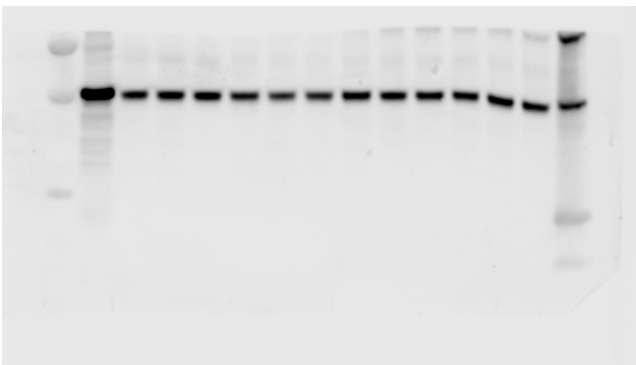

Fig. 2D

SARS-CoV-2

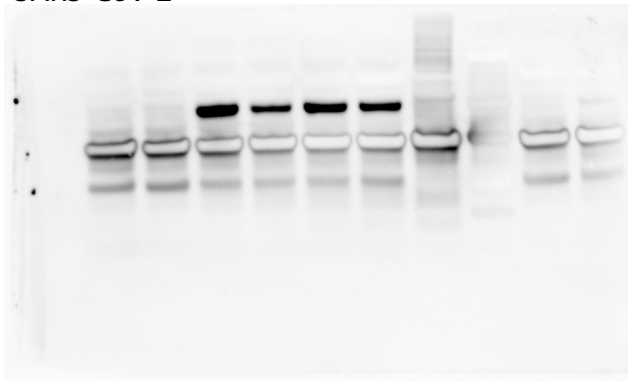

p-MLKL

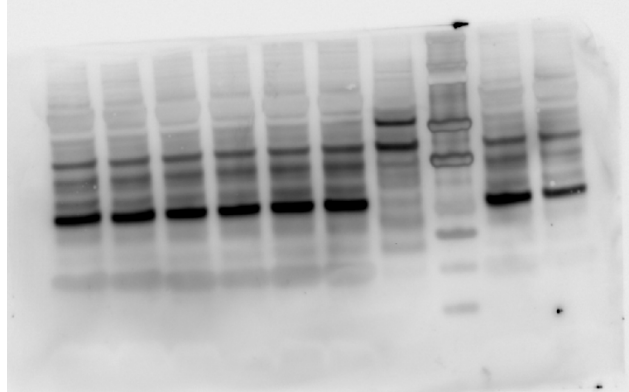

GAPDH (p-MLKL)

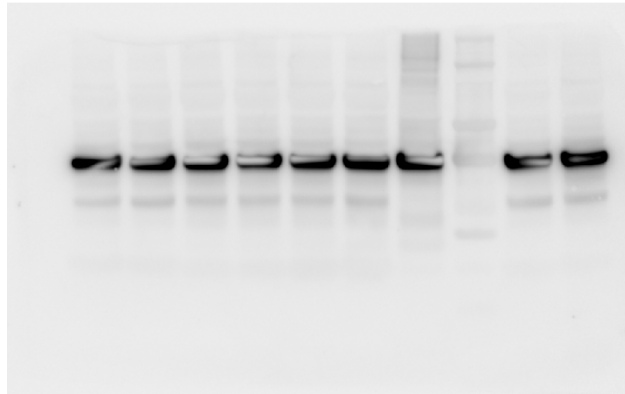

MLKL

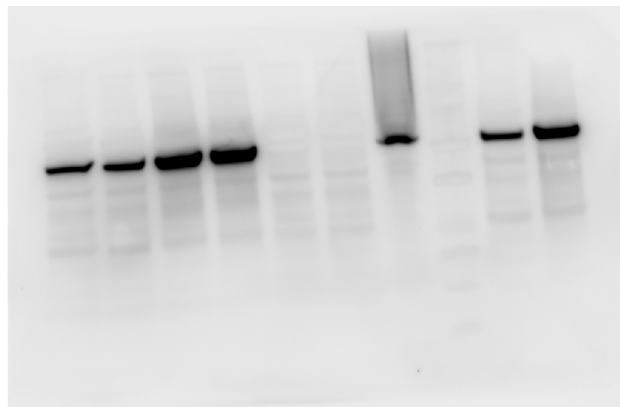

MLKL and GAPDH

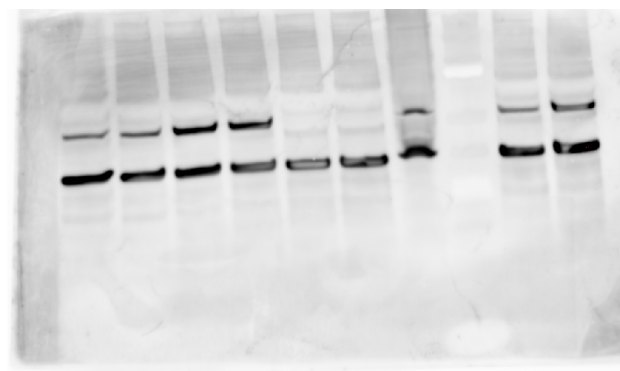

p-RIPK1

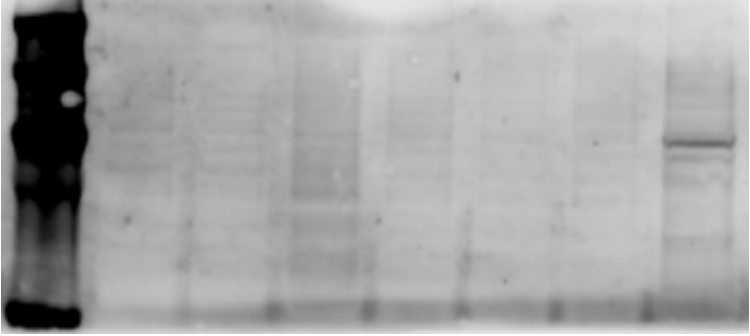

RIPK1

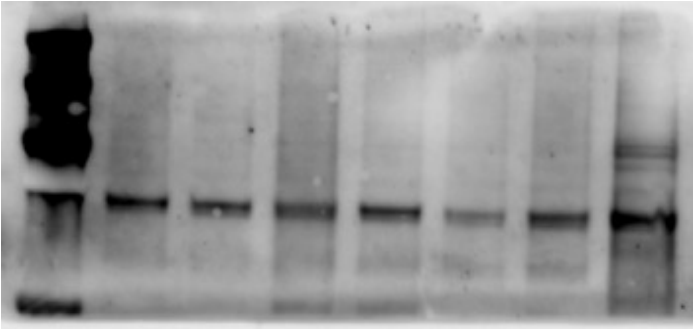

GAPDH (p-RIPK1, RIPK1)

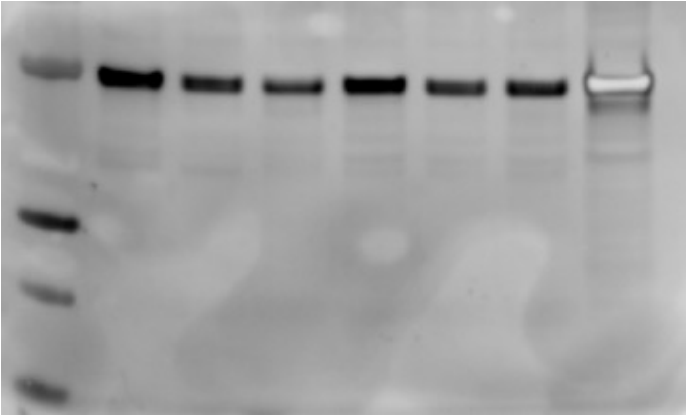



p-RIPK3

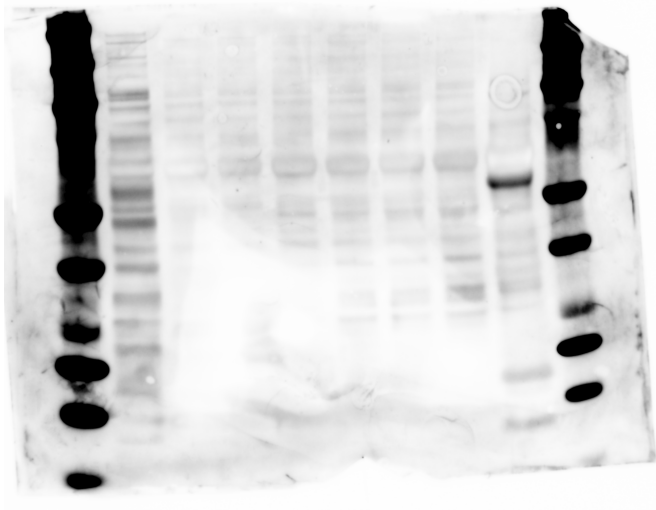

GAPDH (p-RIPK3)

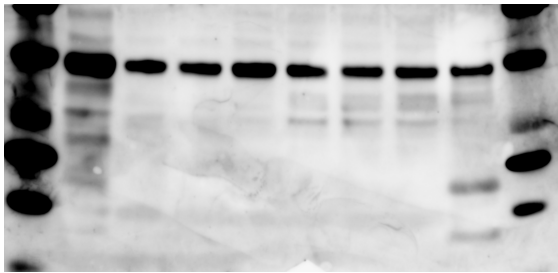

RIPK3

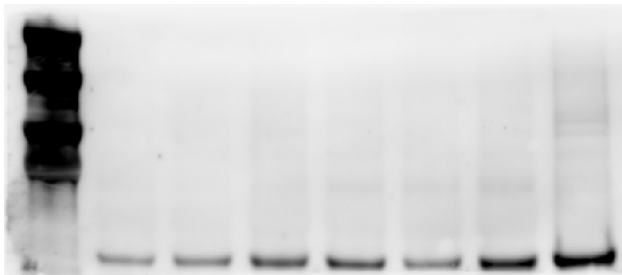

GAPDH (RIPK3)

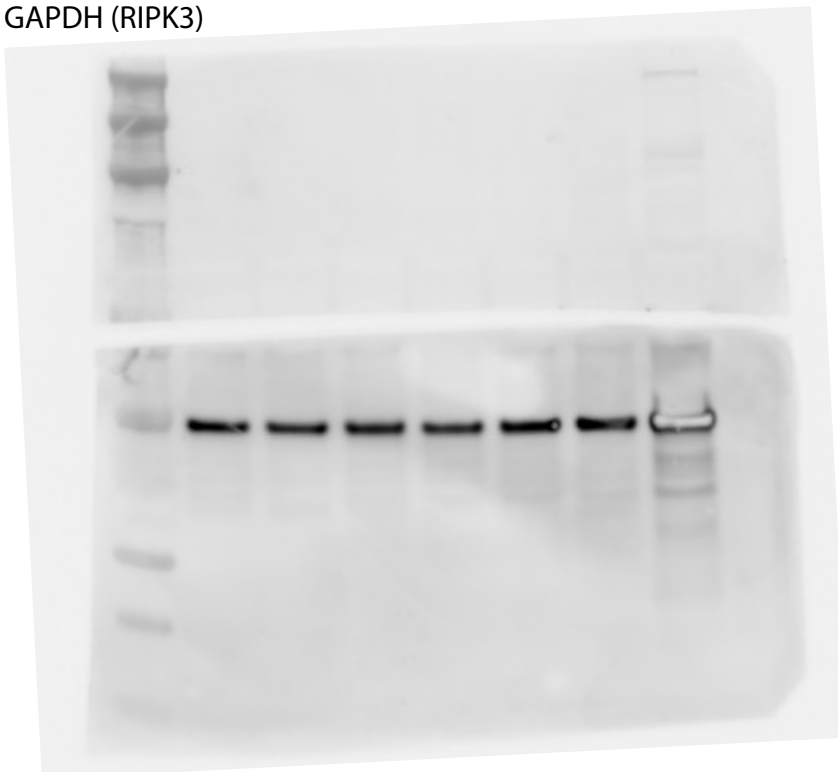

Supplement: 41419_2024_6471_MOESM5_ESM.pdf [file 41419_2024_6471_MOESM5_ESM.pdf]
