# Supplementary material for: Necroptosis does not drive disease pathogenesis in a mouse infective model of SARS-CoV-2 in vivo
Source: PubMed Central journal article supplement (PMC10825138; doi:10.1038/s41419-024-06471-6), 2024-01-30

Figure S1

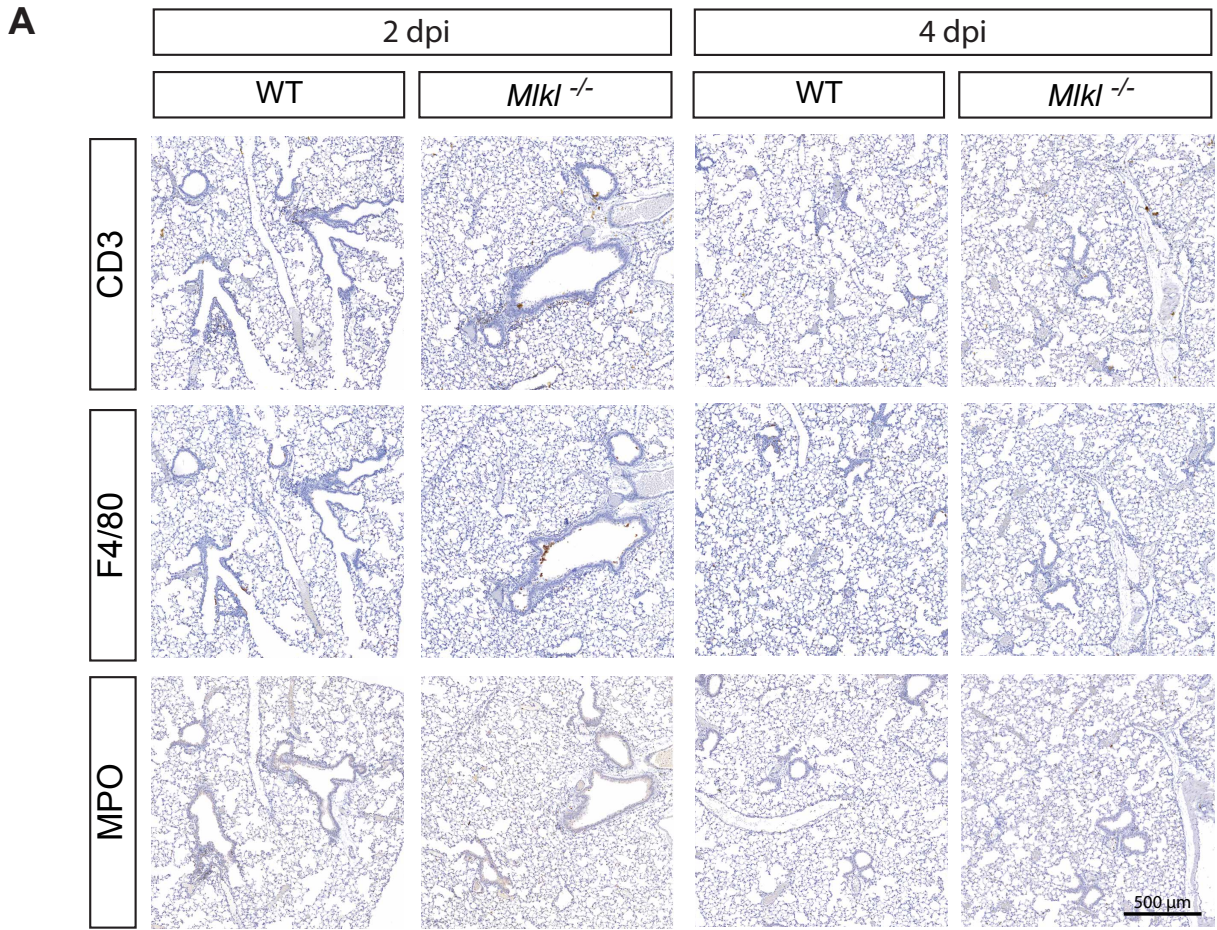

Supplement: 41419_2024_6471_MOESM2_ESM.pdf [file 41419_2024_6471_MOESM2_ESM.pdf]
